# Supplementary material for: A poly-l-glutamic acid functionalized nanocomplex for improved oral drug absorption
Source: Royal Society of Chemistry journal article supplement (doi:10.1039/c5tb01425e), 2015-01-01
Supplement: c5tb01425e1.pdf [file c5tb01425e1.pdf]

**Table S1** showed the number-, weight-average molecular weights ( $M_n$ ,  $M_w$ ) and polydispersity indices (PDI) of PGA. Triple-detection GPC was performed by Malvern Instruments (China) on a Viscotek/Malvern GPC system consisting of a GPCMax with TDA 305 triple detector array (differential RI, right angle light scattering (RALS), and four-capillary differential viscometer detectors). The column was Viscotek A6000M. The flow rate of the eluent was 1.0 mL/min, and the temperature of the column was controlled at 45 °C.

**Table S1**  $M_n$ ,  $M_w$  and PDI of PGA

| Sample | $M_n$          | $M_w$          | PDI ( $M_w/M_n$ ) |
|--------|----------------|----------------|-------------------|
| PGA    | 113,788±1775.1 | 122,954±1979.6 | 1.081             |

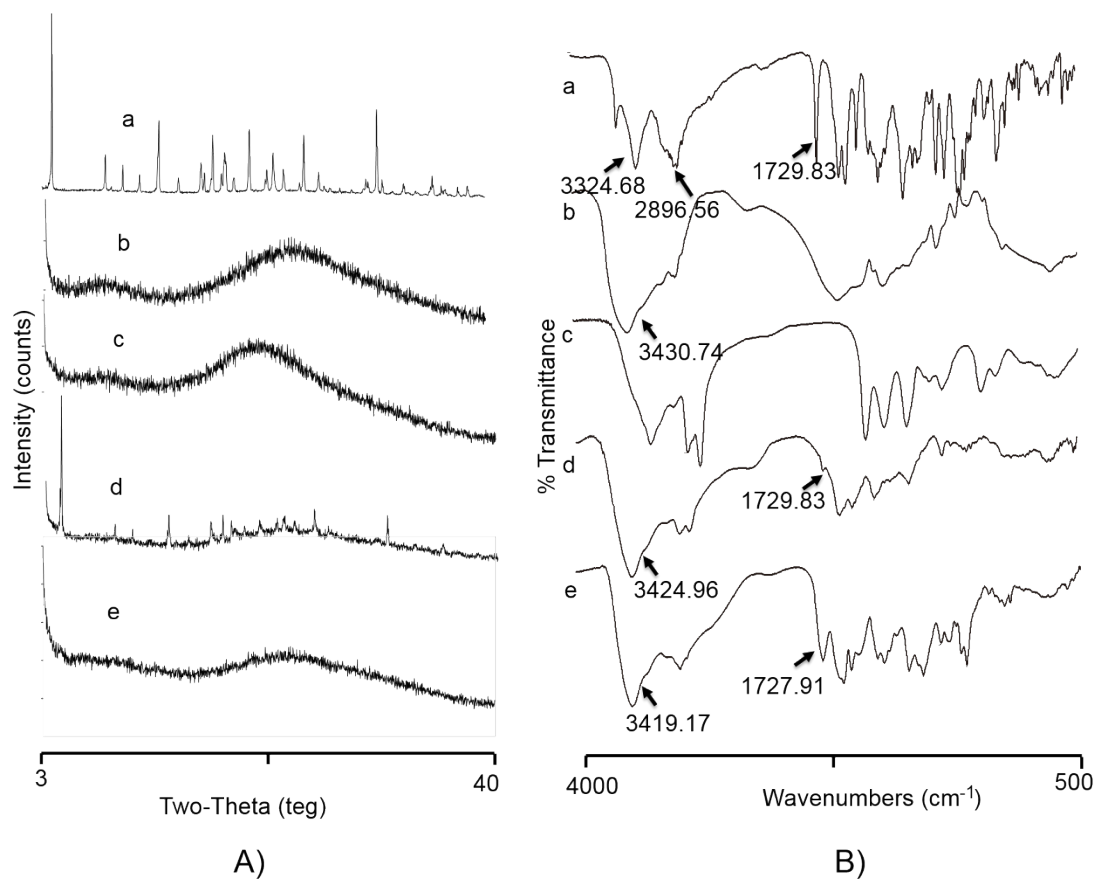

**Figure S1:** The X-ray diffractograms (A) and FT-IR spectra (B) for Dox•HCl, polymers, and TC. a, pure Dox•HCl; b, pure PGA; c, pure PAE; d, Mixture for Dox•HCl, PGA and PAE; e, TC.
